# Supplementary material for: Promoter activity of Merkel cell Polyomavirus variants in human dermal fibroblasts and a Merkel cell carcinoma cell line
Source: Springer Nature journal article supplement (doi:10.1186/s12985-020-01317-x), 2020-04-19
Supplement: MOESM1 [file 17908406]

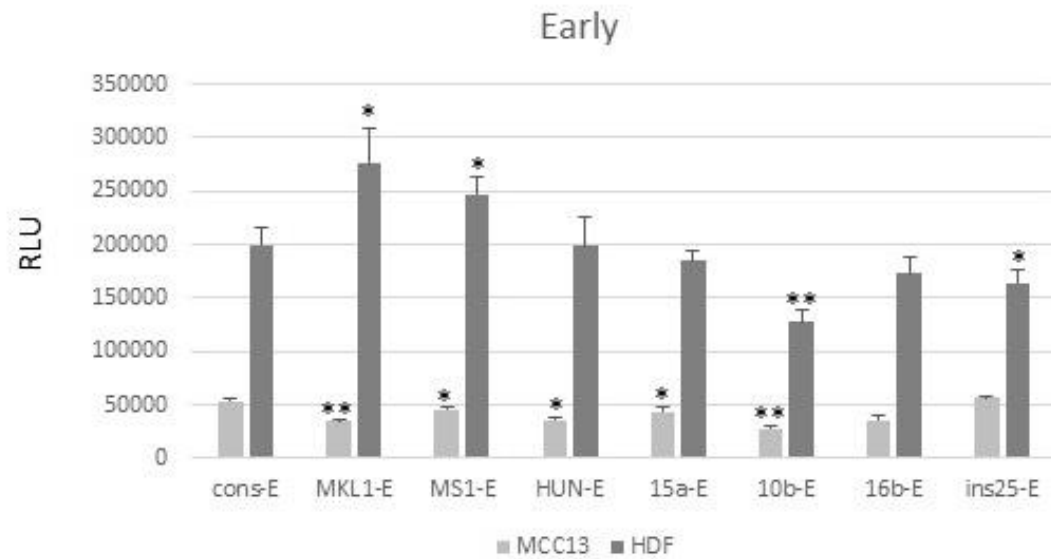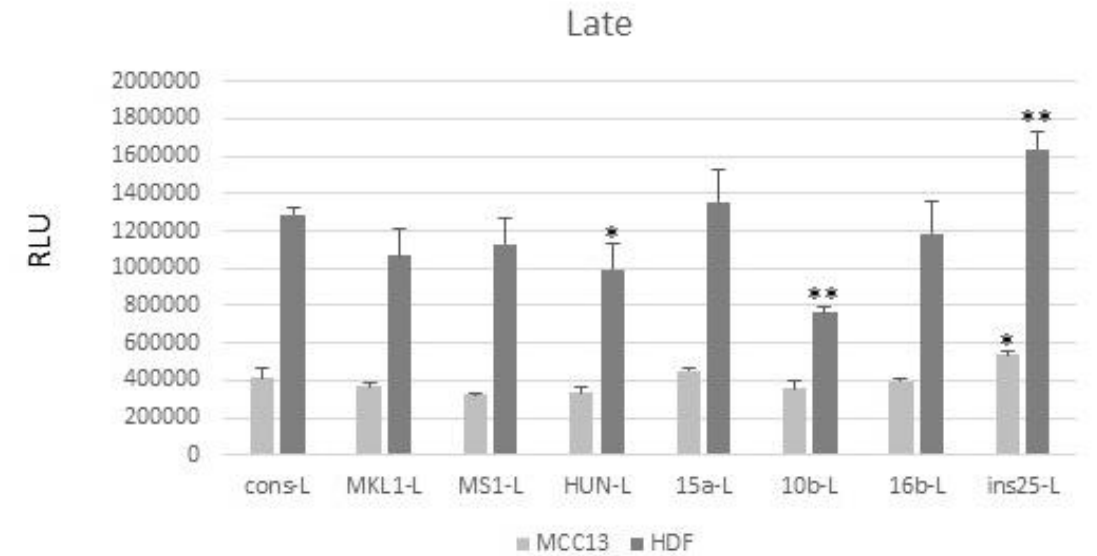

**Supplementary Figure S1.** Early and late promoter activity of seven MCPyV NCCR variants in MCC13 and human dermal fibroblasts. Promoter activities were determined by transient transfection studies with a luciferase reporter gene and are were corrected for the protein content in each sample. Promoter activity is expressed as relative luciferase activity (RLU).

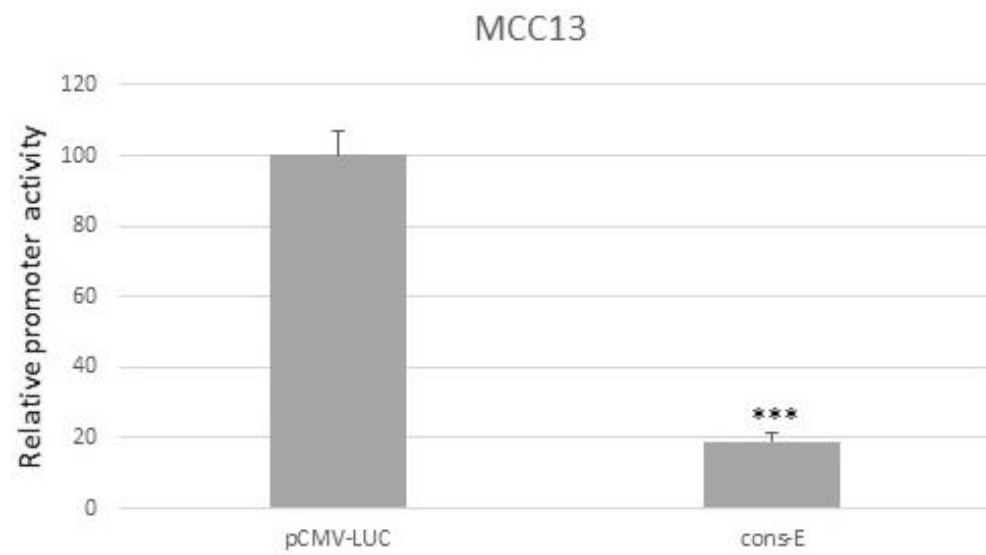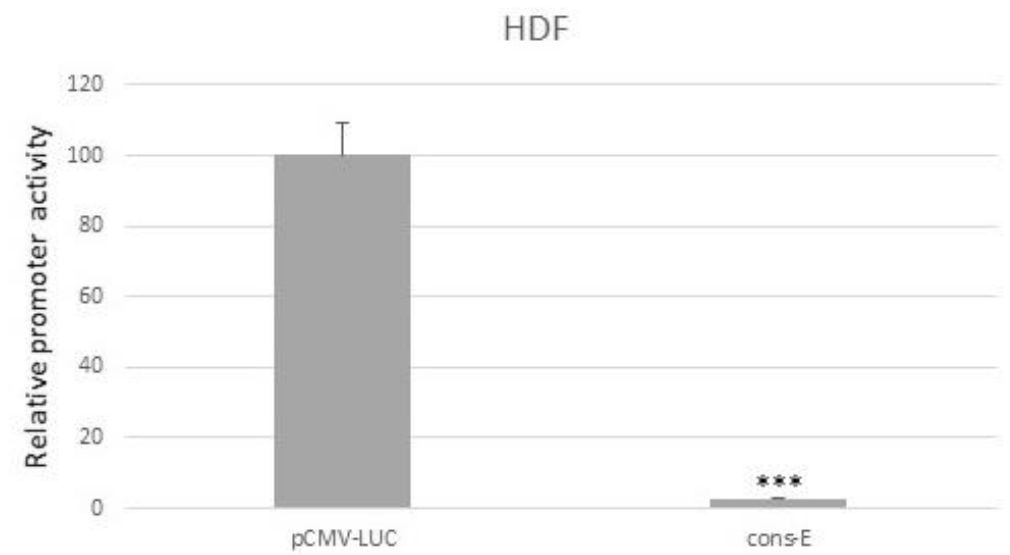

**Supplementary Figure S2.** Relative promoter activity of the immediately early cytomegalovirus and the consensus early MCPyV promoter in MCC13 and human dermal fibroblasts (HDF).

**Supplementary Figure S3.** Putative transcription factor binding sites in the consensus MCPyV NCCR. See Supplementary Table 4 for details.

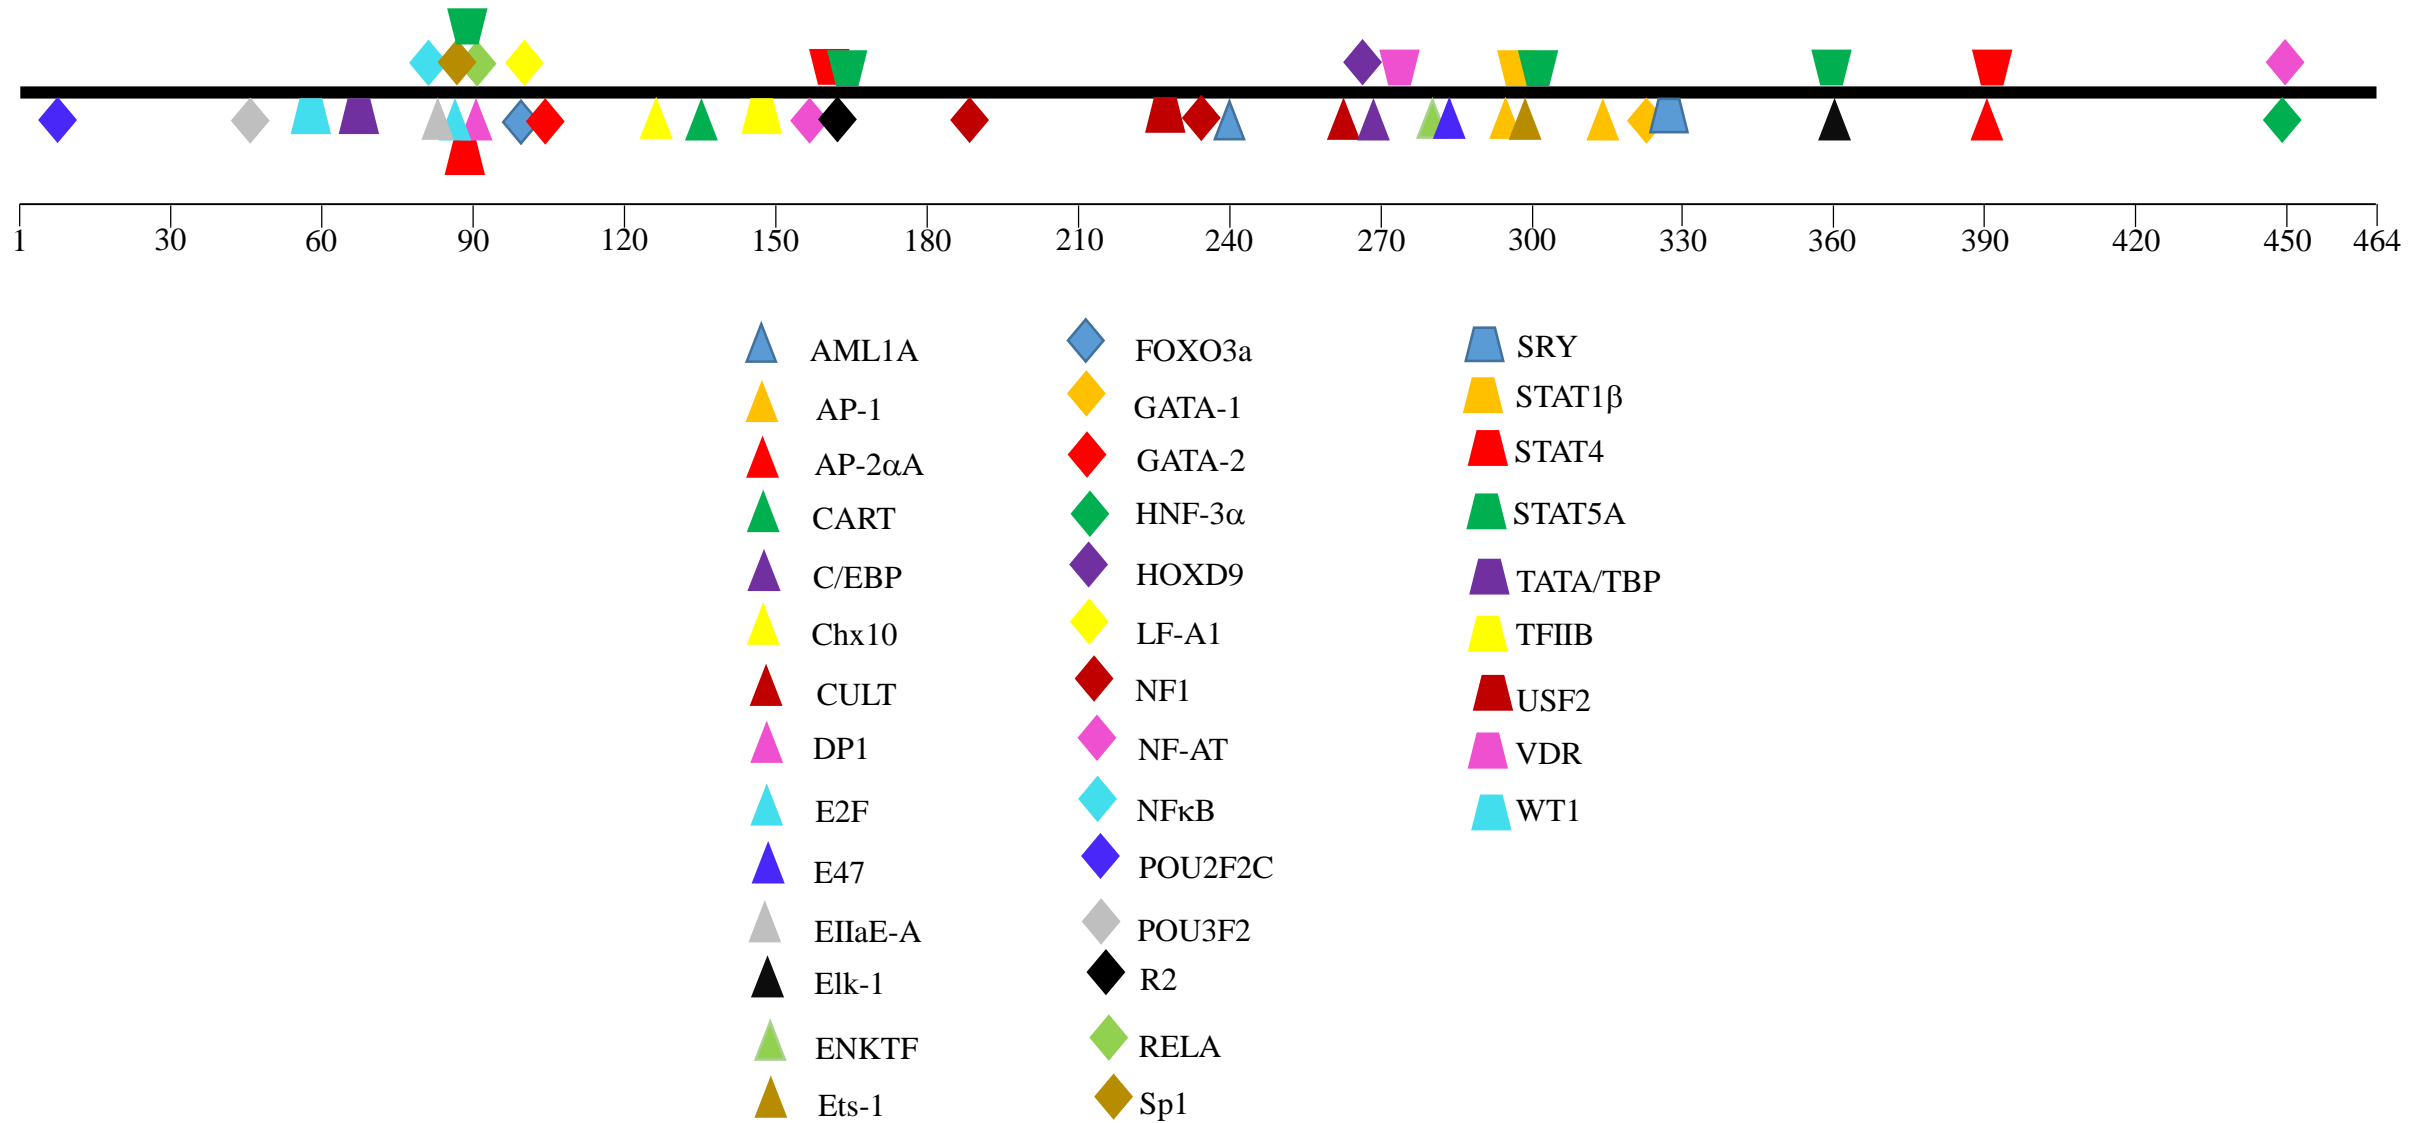

Supplementary Table S1. Detection of MCPyV in benign and diseased human tissues other than Merkel cell carcinoma.

| System                                                                                          | Benign                                       | Reference | Diseased                                           | Reference                                             |          |
|-------------------------------------------------------------------------------------------------|----------------------------------------------|-----------|----------------------------------------------------|-------------------------------------------------------|----------|
| Circulatory system                                                                              | Blood, plasma or serum from healthy donors   | [1-8]     | Cutaneous T- and B-cell lymphoma                   | [14-16]                                               |          |
|                                                                                                 | Sera from HIV-negative patients              | [9]       | Pseudolymphoma                                     | [14]                                                  |          |
|                                                                                                 | PBMC <sup>a</sup> healthy donors             | [3]       | Blood from a patient with Stevens-Johnson syndrome | [17]                                                  |          |
|                                                                                                 | Whole blood from immunocompetent individuals | [10-12]   | Blood from chronic lymphocytic leukemia patients   | [2, 4, 8, 18-22]                                      |          |
|                                                                                                 | Heart                                        |           | [10, 13]                                           | Blood renal transplant patients                       | [23, 24] |
|                                                                                                 |                                              |           |                                                    | Inflammatory monocytes                                | [25]     |
|                                                                                                 |                                              |           |                                                    | Blood MCC patients                                    | [26]     |
|                                                                                                 |                                              |           |                                                    | Blood from an acute myeloid leukemia patient          | [27]     |
|                                                                                                 |                                              |           |                                                    | Sera from HIV-positive patients                       | [9]      |
|                                                                                                 |                                              |           |                                                    | PBMC from patients with Langerhans cell histiocytosis | [28]     |
|                                                                                                 |                                              |           |                                                    | Non-Hodgkin lymphoma                                  | [29, 30] |
|                                                                                                 |                                              |           |                                                    | Hodgkin lymphoma                                      | [29]     |
|                                                                                                 |                                              |           |                                                    | Whole blood from breast cancer patients               | [31]     |
|                                                                                                 |                                              |           |                                                    | Whole blood from immunocompromised patients           | [12]     |
| Sera of AML <sup>b</sup> and ALL patients who underwent hematopoietic stem cell transplantation | [32]                                         |           |                                                    |                                                       |          |
| Blood polytransfused patients with hematological diseases                                       | [8]                                          |           |                                                    |                                                       |          |
| Digestive system                                                                                | Saliva                                       | [33-37]   | Oral mucosa HIV-positive men                       | [26]                                                  |          |
|                                                                                                 | Mouthwash healthy individuals                | [38]      | Colon cancer                                       | [33, 39]                                              |          |

|                      |                   |                                                                              |              |
|----------------------|-------------------|------------------------------------------------------------------------------|--------------|
| Oral tissue/mucosa   | [33, 35]          | Liver from patients with cirrhosis                                           | [10, 13, 33] |
| Feces children       | Li K <sup>c</sup> | Liver cancer                                                                 | [10, 13, 33] |
| Healthy colon tissue | [33, 39]          | Anal cancer sample                                                           | [26]         |
| Stomach              | [10, 13]          | Anal mucosal samples HIV-positive men                                        | [26]         |
| Liver                | [10, 13, 33]      | SCC <sup>d</sup> oral cavity                                                 | [33, 44, 45] |
| Small intestine      | [10, 13, 40]      | SCC larynx                                                                   | [46]         |
| Hemorrhoid           | [40]              | SCC esophagus                                                                | [33, 41, 42] |
| Gall bladder         | [13, 40]          | Tumors of the salivary gland, including Warthin's tumor                      | [30, 47]     |
| Appendix             | [40]              | Head and neck cancer of throat, tongue, cheek, outer ear, larynx, mandibular | [48]         |
| Pancreas             | [13]              | Small cell cancer of the parotid                                             | [49]         |
| Esophagus            | [13, 33, 41, 42]  | Oral tissue renal transplant patients                                        | [34]         |
| Oral tissue          | [34]              | Oral and jaw tumors                                                          | [30]         |
| Salivary gland       | [43]              | Oral mucosa from patients with Langerhans cell histiocytosis                 | [28]         |
|                      |                   | Juvenile nasopharyngeal angiofibroma                                         | [45]         |
|                      |                   | Feces thalassemic patients                                                   | [50]         |
|                      |                   | Feces acute myeloid leukemia patients                                        | [50]         |
|                      |                   | Pleomorphic adenoma                                                          | [43]         |
|                      |                   | Warthin's tumor                                                              | [43]         |

|                      |                                           |                         |                                                                                                           |                      |
|----------------------|-------------------------------------------|-------------------------|-----------------------------------------------------------------------------------------------------------|----------------------|
|                      |                                           |                         | Salivary gland adenocarcinoma                                                                             | [43]                 |
| Endocrine system     | Adrenal gland                             | [13]                    | Pituitary from patients with Langerhans cell histiocytosis                                                | [28]                 |
|                      | Thyroid gland                             | [13]                    |                                                                                                           |                      |
| Excretory System     | Urine healthy                             | [23, 51-53]             | Urine renal transplant patients                                                                           | [23, 24, 51-53]      |
|                      | Urine bladder                             | [10, 13, 33]            | Urine or tumor tissue of bladder cancer patients                                                          | [10, 13, 33, 54]     |
|                      | Kidney                                    | [10, 13]                | Renal carcinoma                                                                                           | [33]                 |
|                      |                                           |                         | Urine patients with orthopedic disorder, acute surgical conditions or ear, nose, skin and dental disorder | [54]                 |
| Integumentary system | Normal skin/cutaneous swabs               | [13, 16, 40, 55-70]     | Skin psoriasis patient                                                                                    | [26, 33, 59, 66, 78] |
|                      | Skin from patients with Verruca vulgaris  | [71-73]                 | Actinic porokeratosis                                                                                     | [78, 79]             |
|                      | Eyebrow hairs                             | [26, 61, 68, 69, 74-76] | Actinic keratosis                                                                                         | [73, 80-82]          |
|                      | Inner root sheath cells of hair follicles | [77]                    | Skin lesions from chronic lymphocytic leukemia patients                                                   | [75]                 |
|                      |                                           |                         | Skin from patients with Langerhans cell histiocytosis                                                     | [28]                 |
|                      |                                           |                         | Skin patient with epidermodysplasia verruciformis                                                         | [83, 84]             |
|                      |                                           |                         | Verrucous papilloma of the skin                                                                           | [85]                 |
|                      |                                           |                         | Cutaneous swabs forehead of HIV-positive patients                                                         | [60]                 |
|                      |                                           |                         | Skin patients with bullous pemphigoid                                                                     | [59]                 |
|                      |                                           |                         | Skin patients with cutaneous drug side-effect                                                             | [59]                 |
|                      |                                           |                         | Skin from patients with seborrheic keratosis                                                              | [71, 86, 87]         |

|  |  |  |                                                             |                                                      |
|--|--|--|-------------------------------------------------------------|------------------------------------------------------|
|  |  |  | Skin from patient with pruritic dermatosis                  | [88]                                                 |
|  |  |  | Atopic dermatitis                                           | [66]                                                 |
|  |  |  | Palmoplantar pustulosis                                     | [66]                                                 |
|  |  |  | Skin from patients with mycosis fungoides                   | [15, 16, 59, 89]                                     |
|  |  |  | Fullicotropic mycosis fungoides (cutaneous T-cell lymphoma) | [90]                                                 |
|  |  |  | Skin from T-cell mediated skin benign infiltrate            | [66]                                                 |
|  |  |  | Sézary syndrome                                             | [15, 89]                                             |
|  |  |  | Fluid skin lesion Stevens-Johnson syndrome                  | [17]                                                 |
|  |  |  | Kaposi's sarcoma                                            | [40, 59, 78, 91, 92]                                 |
|  |  |  | Melanoma                                                    | [93]                                                 |
|  |  |  | Cutaneous SCC                                               | [28, 33, 38, 65, 67, 70, 72, 73, 76, 79, 82, 93-102] |
|  |  |  | Bowen's disease                                             | [71, 79, 94]                                         |
|  |  |  | Atypical fibroxanthoma                                      | [82, 103]                                            |
|  |  |  | Porocarcinoma (cancer of the sweat glands)                  | [63, 65]                                             |
|  |  |  | Dermatofibrosarcoma protuberans                             | [79, 104]                                            |
|  |  |  | Keratoacanthoma                                             | [79, 95]                                             |
|  |  |  | BCC <sup>e</sup>                                            | [36, 70, 79, 81, 82, 93, 94, 105-107]                |
|  |  |  | Langerhans cell sarcoma                                     | [108]                                                |

|                     |                                                                                   |                  |                                                                                   |               |
|---------------------|-----------------------------------------------------------------------------------|------------------|-----------------------------------------------------------------------------------|---------------|
|                     |                                                                                   |                  | Trichoblastoma                                                                    | [105]         |
|                     |                                                                                   |                  | SCC of the skin                                                                   | [107, 109]    |
|                     |                                                                                   |                  | Spitz naevus                                                                      | [110]         |
|                     |                                                                                   |                  | Non-melanoma skin cancer (including BCC, SCC, actinic keratosis, Bowen's disease) | [111]         |
|                     |                                                                                   |                  | Fanconi anemia-associated head and neck SCC                                       | [112]         |
| Lymphatic system    | Lymph nodes                                                                       | [29]             | Tonsillar SCC                                                                     | [114, 115]    |
|                     | Lymphoid tissue                                                                   | [113]            | Epithelial thymic tumors                                                          | [119]         |
|                     | Bone marrow                                                                       | [13]             |                                                                                   |               |
|                     | Spleen                                                                            | [13]             |                                                                                   |               |
|                     | Tonsils                                                                           | [1, 37, 114-118] |                                                                                   |               |
|                     | Adenoid tissue                                                                    | [116]            |                                                                                   |               |
| Nervous system      | Brain                                                                             | [10]             | CNS tumors                                                                        | [30, 120]     |
| Reproductive system | Prostate                                                                          | [13]             | Prostatic secretion prostate cancer patients                                      | [123]         |
|                     | Cervix                                                                            | [121]            | Prostate cancer                                                                   | [33, 124]     |
|                     | Ovary                                                                             | [10]             | Cervical SCC carcinoma                                                            | [125, 126]    |
|                     | Placenta                                                                          | [122]            | Cervical adenocarcinoma                                                           | [125, 126]    |
|                     | Testis                                                                            | [13]             | Undifferentiated carcinomas of the cervix                                         | [126]         |
|                     | Vagina, cervix, vulvar skin, anus from immunodeficient patient with WILD syndrome | [26]             | Breast cancer                                                                     | [31, 127-130] |



|                    |                                                             |                   |                                                                                                                |                 |
|--------------------|-------------------------------------------------------------|-------------------|----------------------------------------------------------------------------------------------------------------|-----------------|
|                    | (warts, immunodeficiency, lymphedema, anogenital dysplasia) |                   | Benign breast disease                                                                                          | [31]            |
|                    |                                                             |                   | Testical cancer tissue (seminoma)                                                                              | [33]            |
|                    |                                                             |                   | Penile mucosal HIV-positive men                                                                                | [26]            |
| Respiratory system | NPA <sup>e</sup>                                            | [1, 113, 131-135] | NPA from patients with infectious diseases, hematology disorder, intensive care or cardiac or thoracic disease | [137]           |
|                    | lung                                                        | [10, 17, 33, 136] | NPA of renal transplant patients                                                                               | [23]            |
|                    |                                                             |                   | NPA of cystic fibrosis patients                                                                                | [138]           |
|                    |                                                             |                   | Non-small cell lung cancer                                                                                     | [101, 139-144]  |
|                    |                                                             |                   | SCC of the lung                                                                                                | [100, 140, 145] |
|                    |                                                             |                   | Adenocarcinoma                                                                                                 | [100, 140-145]  |
|                    |                                                             |                   | Large-cell neuroendocrine carcinoma                                                                            | [100]           |
|                    |                                                             |                   | Pleomorphic carcinoma                                                                                          | [100]           |
|                    |                                                             |                   | Bronchoalveolar carcinoma                                                                                      | [141]           |
|                    |                                                             |                   | Lung cancer (not specified)                                                                                    | [33]            |
|                    |                                                             |                   | Small cell lung cancer                                                                                         | [139, 146]      |
|                    |                                                             |                   | Extrapulmonary small cell carcinoma                                                                            | [147]           |
|                    |                                                             |                   | Mesothelioma                                                                                                   | [148]           |
| Skeletal system    |                                                             |                   | Bone from patients with Langerhans cell histiocytosis                                                          | [28]            |
|                    |                                                             |                   | Ewing sarcoma                                                                                                  | [102]           |

<sup>e</sup>Peripheral blood mononuclear cell

<sup>b</sup>Acute myeloid leukemia (AML) and acute lymphoblastic leukemia (ALL)

<sup>c</sup>Direct submission Li K

<sup>d</sup>Squamous cell carcinoma

<sup>e</sup>Basal cell carcinoma

<sup>f</sup>Nasopharyngeal aspirates

## References

1. Kantola K, Sadeghi M, Lahtinen A, Koskenvuo M, Aaltonen LM, Mottonen M, Rahiala J, Saarinen-Pihkala U, Riikonen P, Jartti T *et al*: **Merkel cell polyomavirus DNA in tumor-free tonsillar tissues and upper respiratory tract samples: implications for respiratory transmission and latency.** *Journal of clinical virology : the official publication of the Pan American Society for Clinical Virology* 2009, **45**(4):292-295.
2. Pantulu ND, Pallasch CP, Kurz AK, Kassem A, Frenzel L, Sodenkamp S, Kvasnicka HM, Wendtner CM, Zur Hausen A: **Detection of a novel truncating Merkel cell polyomavirus large T antigen deletion in chronic lymphocytic leukemia cells.** *Blood* 2010, **116**(24):5280-5284.
3. Pancaldi C, Corazzari V, Maniero S, Mazzoni E, Comar M, Martini F, Tognon M: **Merkel cell polyomavirus DNA sequences in the buffy coats of healthy blood donors.** *Blood* 2011, **117**(26):7099-7101.
4. Imajoh M, Hashida Y, Taniguchi A, Kamioka M, Daibata M: **Novel human polyomaviruses, Merkel cell polyomavirus and human polyomavirus 9, in Japanese chronic lymphocytic leukemia cases.** *Journal of hematology & oncology* 2012, **5**:25.
5. Ngoi CN, Siqueira J, Li L, Deng X, Mugo P, Graham SM, Price MA, Sanders EJ, Delwart E: **The plasma virome of febrile adult Kenyans shows frequent parvovirus B19 infections and a novel arbovirus (Kadipiro virus).** *J Gen Virol* 2016, **97**(12):3359-3367.
6. Lau P, Cordey S, Brito F, Tirefort D, Petty TJ, Turin L, Guichebaron A, Docquier M, Zdobnov EM, Waldvogel-Abramowski S *et al*: **Metagenomics analysis of red blood cell and fresh-frozen plasma units.** *Transfusion* 2017, **57**(7):1787-1800.
7. Mazzoni E, Rotondo JC, Marracino L, Selvatici R, Bononi I, Torreggiani E, Touze A, Martini F, Tognon MG: **Detection of Merkel Cell Polyomavirus DNA in Serum Samples of Healthy Blood Donors.** *Frontiers in oncology* 2017, **7**:294.
8. Comar M, Zanotta N, Del Savio R, Vascotto F, Calabrese N, Zorat F, Pozzato G: **No evidence of Polyomavirus and EBV infections in Italian patients with mixed cryoglobulinemia infected chronically with HCV.** *J Med Virol* 2014, **86**(4):666-671.
9. Fukumoto H, Sato Y, Hasegawa H, Katano H: **Frequent detection of Merkel cell polyomavirus DNA in sera of HIV-1-positive patients.** *Virology* 2013, **453**:84.
10. Mancuso G, Antona J, Sirini C, Salvo M, Giacometti L, Olivero C, Trisolini E, Indellicato R, Boldorini R: **Frequent detection of Merkel cell polyomavirus DNA in tissues from 10 consecutive autopsies.** *J Gen Virol* 2017, **98**(6):1372-1376.
11. Shahzad N, Hussain I, Gilani US, Tayyeb A, Aslam MA, Khurshid M, Hassan U, Tasneem F, Umer M, Rashid N: **Merkel cell polyomavirus DNA sequences in the blood of healthy population of Pakistan.** *Future microbiology* 2019, **14**:599-608.

12. Jin HT, Park SJ, Choi EK, Kim YS: **The frequency of Merkel cell polyomavirus in whole blood from immunocompetent and immunosuppressed patients with kidney disease and healthy donors.** *Microbial pathogenesis* 2019, **131**:75-80.
13. Matsushita M, Kuwamoto S, Iwasaki T, Higaki-Mori H, Yashima S, Kato M, Murakami I, Horie Y, Kitamura Y, Hayashi K: **Detection of Merkel cell polyomavirus in the human tissues from 41 Japanese autopsy cases using polymerase chain reaction.** *Intervirology* 2013, **56**(1):1-5.
14. Andres C, Puchta U, Sander CA, Ruzicka T, Flaig MJ: **Prevalence of Merkel cell polyomavirus DNA in cutaneous lymphomas, pseudolymphomas, and inflammatory skin diseases.** *The American Journal of dermatopathology* 2010, **32**(6):593-598.
15. Kreuter A, Silling S, Dewan M, Stucker M, Wieland U: **Evaluation of 4 recently discovered human polyomaviruses in primary cutaneous B-cell and T-cell lymphoma.** *Archives of dermatology* 2011, **147**(12):1449-1451.
16. Du-Thanh A, Foulongne V, Guillot B, Dereure O: **Recently discovered human polyomaviruses in lesional and non-lesional skin of patients with primary cutaneous T-cell lymphomas.** *Journal of dermatological science* 2013, **71**(2):140-142.
17. Maximova N, Granzotto M, Kiren V, Zanon D, Comar M: **First description of Merkel Cell polyomavirus DNA detection in a patient with Stevens-Johnson syndrome.** *J Med Virol* 2013, **85**(5):918-923.
18. Teman CJ, Tripp SR, Perkins SL, Duncavage EJ: **Merkel cell polyomavirus (MCPyV) in chronic lymphocytic leukemia/small lymphocytic lymphoma.** *Leukemia research* 2011, **35**(5):689-692.
19. Haugg AM, Speel EJ, Pantulu ND, Pallasch C, Kurz AK, Kvasnicka HM, Cathomas G, Wendtner CM, zur Hausen A: **Fluorescence in situ hybridization confirms the presence of Merkel cell polyomavirus in chronic lymphocytic leukemia cells.** *Blood* 2011, **117**(21):5776-5777.
20. Comar M, Cuneo A, Maestri I, Melloni E, Pozzato G, Soffritti O, Secchiero P, Zauli G: **Merkel-cell polyomavirus (MCPyV) is rarely associated to B-chronic lymphocytic leukemia (1 out of 50) samples and occurs late in the natural history of the disease.** *Journal of clinical virology : the official publication of the Pan American Society for Clinical Virology* 2012, **55**(4):367-369.
21. Cimino PJ, Jr., Bahler DW, Duncavage EJ: **Detection of Merkel cell polyomavirus in chronic lymphocytic leukemia T-cells.** *Experimental and molecular pathology* 2013, **94**(1):40-44.
22. Trizuljak J, Srovnal J, Plevova K, Brychtova Y, Semerad L, Bakesova D, Letalova E, Benedikova A, Mayer J, Hajduch M *et al*: **Analysis of prognostic significance of merkel cell polyomavirus in chronic lymphocytic leukemia.** *Clinical lymphoma, myeloma & leukemia* 2015, **15**(7):439-442.
23. Bialasiewicz S, Rockett RJ, Barraclough KA, Leary D, Dudley KJ, Isbel NM, Sloots TP: **Detection of Recently Discovered Human Polyomaviruses in a Longitudinal Kidney Transplant Cohort.** *American journal of transplantation : official journal of the American Society of Transplantation and the American Society of Transplant Surgeons* 2016, **16**(9):2734-2740.
24. Wang Y, Strassl R, Helantera I, Aberle SW, Bond G, Hedman K, Weseslindtner L: **Multiplex analysis of Human Polyomavirus diversity in kidney transplant recipients with BK virus replication.** *Journal of clinical virology : the official publication of the Pan American Society for Clinical Virology* 2019, **120**:6-11.
25. Mertz KD, Junt T, Schmid M, Pfaltz M, Kempf W: **Inflammatory monocytes are a reservoir for Merkel cell polyomavirus.** *J Invest Dermatol* 2010, **130**(4):1146-1151.
26. Wieland U, Mauch C, Kreuter A, Krieg T, Pfister H: **Merkel cell polyomavirus DNA in persons without merkel cell carcinoma.** *Emerging infectious diseases* 2009, **15**(9):1496-1498.

27. Song Y, Gyarmati P: **Identification of Merkel Cell Polyomavirus from a Patient with Acute Myeloid Leukemia.** *Genome announcements* 2017, **5**(3).
28. Murakami I, Matsushita M, Iwasaki T, Kuwamoto S, Kato M, Horie Y, Hayashi K, Imamura T, Morimoto A, Imashuku S *et al*: **Merkel cell polyomavirus DNA sequences in peripheral blood and tissues from patients with Langerhans cell histiocytosis.** *Human pathology* 2014, **45**(1):119-126.
29. Toracchio S, Foyle A, Sroller V, Reed JA, Wu J, Kozinetz CA, Butel JS: **Lymphotropism of Merkel cell polyomavirus infection, Nova Scotia, Canada.** *Emerging infectious diseases* 2010, **16**(11):1702-1709.
30. Tanio S, Matsushita M, Kuwamoto S, Horie Y, Kodani I, Murakami I, Ryoke K, Hayashi K: **Low prevalence of Merkel cell polyomavirus with low viral loads in oral and maxillofacial tumours or tumour-like lesions from immunocompetent patients: Absence of Merkel cell polyomavirus-associated neoplasms.** *Molecular and clinical oncology* 2015, **3**(6):1301-1306.
31. Peng J, Wang T, Zhu H, Guo J, Li K, Yao Q, Lv Y, Zhang J, He C, Chen J *et al*: **Multiplex PCR/mass spectrometry screening of biological carcinogenic agents in human mammary tumors.** *Journal of clinical virology : the official publication of the Pan American Society for Clinical Virology* 2014, **61**(2):255-259.
32. Rahiala J, Koskenvuo M, Sadeghi M, Waris M, Vuorinen T, Lappalainen M, Saarinen-Pihkala U, Allander T, Soderlund-Venermo M, Hedman K *et al*: **Polyomaviruses BK, JC, KI, WU, MC, and TS in children with allogeneic hematopoietic stem cell transplantation.** *Pediatric transplantation* 2016, **20**(3):424-431.
33. Loyo M, Guerrero-Preston R, Brait M, Hoque MO, Chuang A, Kim MS, Sharma R, Liegeois NJ, Koch WM, Califano JA *et al*: **Quantitative detection of Merkel cell virus in human tissues and possible mode of transmission.** *Int J Cancer* 2010, **126**(12):2991-2996.
34. Baez CF, Guimaraes MA, Martins RA, Zalona AC, Cossatis JJ, Zalis MG, Cavalcanti SM, Varella RB: **Detection of Merkel cell polyomavirus in oral samples of renal transplant recipients without Merkel cell carcinoma.** *J Med Virol* 2013, **85**(11):2016-2019.
35. Freze Baez C, Cirauqui Diaz N, Baeta Cavalcanti SM, Brandao Varella R: **Genetic and structural analysis of Merkel cell polyomavirus large T antigen from diverse biological samples.** *Intervirology* 2014, **57**(6):331-336.
36. Baez CF, Diaz NC, Venceslau MT, Luz FB, Guimaraes MA, Zalis MG, Varella RB: **Phylogenetic and structural analysis of merkel cell polyomavirus VP1 in Brazilian samples.** *Virus research* 2016, **221**:1-7.
37. Kourieh A, Combes JD, Tommasino M, Dalstein V, Clifford GM, Lacau St Guily J, Clavel C, Franceschi S, Gheit T, For The Split Study G: **Prevalence and risk factors of human polyomavirus infections in non-malignant tonsils and gargles: the SPLIT study.** *J Gen Virol* 2018, **99**(12):1686-1698.
38. Dworkin AM, Tseng SY, Allain DC, Iwenofu OH, Peters SB, Toland AE: **Merkel cell polyomavirus in cutaneous squamous cell carcinoma of immunocompetent individuals.** *J Invest Dermatol* 2009, **129**(12):2868-2874.
39. Campello C, Comar M, D'Agaro P, Minicozzi A, Rodella L, Poli A: **A molecular case-control study of the Merkel cell polyomavirus in colon cancer.** *J Med Virol* 2011, **83**(4):721-724.
40. Feng H, Shuda M, Chang Y, Moore PS: **Clonal integration of a polyomavirus in human Merkel cell carcinoma.** *Science (New York, NY)* 2008, **319**(5866):1096-1100.
41. Yahyapour Y, Sadeghi F, Alizadeh A, Rajabnia R, Siadati S: **Detection of Merkel Cell Polyomavirus and Human Papillomavirus in Esophageal Squamous Cell Carcinomas and Non-Cancerous Esophageal Samples in Northern Iran.** *Pathology oncology research : POR* 2016, **22**(4):667-672.

42. Yahyapour Y, Rahmani R, Alipour M, Alizadeh A, Khademian A, Sadeghi F: **Prevalence and association of human papillomavirus, Epstein-Barr virus and Merkel Cell polyomavirus with neoplastic esophageal lesions in northern Iran.** *Caspian journal of internal medicine* 2018, **9**(4):353-360.
43. Chen AA, Gheit T, Stellin M, Lupato V, Spinato G, Fuson R, Menegaldo A, McKay-Chopin S, Dal Cin E, Tirelli G *et al*: **Oncogenic DNA viruses found in salivary gland tumors.** *Oral Oncol* 2017, **75**:106-110.
44. Hamiter M, Asarkar A, Rogers D, Moore-Medlin T, McClure G, Ma X, Vanchiere J, Nathan CO: **A pilot study of Merkel cell polyomavirus in squamous cell carcinoma of the tongue.** *Oral Oncol* 2017, **74**:111-114.
45. Dickinson A, Xu M, Silen S, Wang Y, Fu Y, Sadeghi M, Toppinen M, Carpen T, Hedman K, Makitie A *et al*: **Newly detected DNA viruses in juvenile nasopharyngeal angiofibroma (JNA) and oral and oropharyngeal squamous cell carcinoma (OSCC/OPSCC).** *European archives of oto-rhino-laryngology : official journal of the European Federation of Oto-Rhino-Laryngological Societies (EUFOS) : affiliated with the German Society for Oto-Rhino-Laryngology - Head and Neck Surgery* 2019, **276**(2):613-617.
46. Vazquez-Guillen JM, Palacios-Saucedo GC, Rivera-Morales LG, Alonzo-Morado MV, Burciaga-Bernal SB, Montufar-Martinez M, Ortiz-Lopez R, Gonzalez-Villasana V, Martinez-Torres AC, Serna-Hernandez JC *et al*: **Infection and coinfection by human papillomavirus, Epstein-Barr virus and Merkel cell polyomavirus in patients with squamous cell carcinoma of the larynx: a retrospective study.** *PeerJ* 2018, **6**:e5834.
47. Ramqvist T, Ursu RG, Haegblom L, Mirzaie L, Gahm C, Hammarstedt-Nordenvall L, Dalianis T, Nasman A: **Human Polyomaviruses Are Not Frequently Present in Cancer of the Salivary Glands.** *Anticancer research* 2018, **38**(5):2871-2874.
48. Mohebbi E, Noormohamadi Z, Sadeghi-Rad H, Sadeghi F, Yahyapour Y, Vaziri F, Rahimi A, Rahimi Jamnani F, Mehrabi S, Siadat SD *et al*: **Low viral load of Merkel cell polyomavirus in Iranian patients with head and neck squamous cell carcinoma: Is it clinically important?** *J Med Virol* 2018, **90**(2):344-350.
49. Fisher CA, Harms PW, McHugh JB, Edwards PC, Siddiqui J, Palanisamy N, Bichakjian CK, Benavides E, Danciu TE: **Small cell carcinoma in the parotid harboring Merkel cell polyomavirus.** *Oral surgery, oral medicine, oral pathology and oral radiology* 2014, **118**(6):703-712.
50. Prezioso C, Ciotti M, Obregon F, Ambroselli D, Rodio DM, Cudillo L, Gaziev J, Mele A, Nardi A, Favalli C *et al*: **Polyomaviruses shedding in stool of patients with hematological disorders: detection analysis and study of the non-coding control region's genetic variability.** *Medical microbiology and immunology* 2019.
51. Husseiny MI, Anastasi B, Singer J, Lacey SF: **A comparative study of Merkel cell, BK and JC polyomavirus infections in renal transplant recipients and healthy subjects.** *Journal of clinical virology : the official publication of the Pan American Society for Clinical Virology* 2010, **49**(2):137-140.
52. Signorini L, Belingheri M, Ambrogi F, Pagani E, Binda S, Ticozzi R, Ferraresso M, Ghio L, Giacon B, Ferrante P *et al*: **High frequency of Merkel cell polyomavirus DNA in the urine of kidney transplant recipients and healthy controls.** *Journal of clinical virology : the official publication of the Pan American Society for Clinical Virology* 2014, **61**(4):565-570.
53. Torres C, Barrios ME, Cammarata RV, Cisterna DM, Estrada T, Martini Novas S, Cahn P, Blanco Fernandez MD, Mbayed VA: **High diversity of human polyomaviruses in environmental and clinical samples in Argentina: Detection of JC, BK, Merkel-cell, Malawi, and human 6 and 7 polyomaviruses.** *The Science of the total environment* 2016, **542**(Pt A):192-202.
54. Polesel J, Gheit T, Talamini R, Shahzad N, Lenardon O, Sylla B, La Vecchia C, Serraino D, Tommasino M, Franceschi S: **Urinary human polyomavirus and papillomavirus infection and bladder cancer risk.** *Br J Cancer* 2012, **106**(1):222-226.

55. Schowalter RM, Pastrana DV, Pumphrey KA, Moyer AL, Buck CB: **Merkel cell polyomavirus and two previously unknown polyomaviruses are chronically shed from human skin.** *Cell Host Microbe* 2010, **7**(6):509-515.
56. Foulongne V, Sauvage V, Hebert C, Dereure O, Cheval J, Gouilh MA, Pariente K, Segondy M, Burguiere A, Manuguerra JC *et al*: **Human skin microbiota: high diversity of DNA viruses identified on the human skin by high throughput sequencing.** *PLoS One* 2012, **7**(6):e38499.
57. Martel-Jantin C, Filippone C, Tortevoeye P, Afonso PV, Betsem E, Descorps-Declere S, Nicol JT, Touze A, Coursaget P, Crouzat M *et al*: **Molecular epidemiology of merkel cell polyomavirus: evidence for geographically related variant genotypes.** *J Clin Microbiol* 2014, **52**(5):1687-1690.
58. Hashida Y, Higuchi T, Matsui K, Shibata Y, Nakajima K, Sano S, Daibata M: **Genetic Variability of the Noncoding Control Region of Cutaneous Merkel Cell Polyomavirus: Identification of Geographically Related Genotypes.** *J Infect Dis* 2018, **217**(10):1601-1611.
59. Foulongne V, Kluger N, Dereure O, Mercier G, Moles JP, Guillot B, Segondy M: **Merkel cell polyomavirus in cutaneous swabs.** *Emerging infectious diseases* 2010, **16**(4):685-687.
60. Wieland U, Silling S, Scola N, Potthoff A, Gambichler T, Brockmeyer NH, Pfister H, Kreuter A: **Merkel cell polyomavirus infection in HIV-positive men.** *Archives of dermatology* 2011, **147**(4):401-406.
61. Hampras SS, Giuliano AR, Lin HY, Fisher KJ, Abrahamsen ME, McKay-Chopin S, Gheit T, Tommasino M, Rollison DE: **Natural history of polyomaviruses in men: the HPV infection in men (HIM) study.** *J Infect Dis* 2015, **211**(9):1437-1446.
62. Hashida Y, Kamioka M, Tanaka M, Hosokawa S, Murakami M, Nakajima K, Kikuchi H, Fujieda M, Sano S, Daibata M: **Ecology of Merkel Cell Polyomavirus in Healthy Skin Among Individuals in an Asian Cohort.** *J Infect Dis* 2016, **213**(11):1708-1716.
63. Urso C, Pierucci F, Sollai M, Arvia R, Massi D, Zakrzewska K: **Detection of Merkel cell polyomavirus and human papillomavirus DNA in porocarcinoma.** *Journal of clinical virology : the official publication of the Pan American Society for Clinical Virology* 2016, **78**:71-73.
64. Hashida Y, Nakajima K, Nakajima H, Shiga T, Tanaka M, Murakami M, Matsuzaki S, Naganuma S, Kuroda N, Seki Y *et al*: **High load of Merkel cell polyomavirus DNA detected in the normal skin of Japanese patients with Merkel cell carcinoma.** *Journal of clinical virology : the official publication of the Pan American Society for Clinical Virology* 2016, **82**:101-107.
65. Arvia R, Sollai M, Pierucci F, Urso C, Massi D, Zakrzewska K: **Droplet digital PCR (ddPCR) vs quantitative real-time PCR (qPCR) approach for detection and quantification of Merkel cell polyomavirus (MCPyV) DNA in formalin fixed paraffin embedded (FFPE) cutaneous biopsies.** *Journal of virological methods* 2017, **246**:15-20.
66. Hashida Y, Higuchi T, Tanaka M, Shibata Y, Nakajima K, Sano S, Daibata M: **Prevalence and Viral Loads of Cutaneous Human Polyomaviruses in the Skin of Patients With Chronic Inflammatory Skin Diseases.** *J Infect Dis* 2019, **219**(10):1564-1573.
67. Wang Y, Keinonen A, Koskenmies S, Pitkanen S, Fyhrquist N, Sadeghi M, Makisalo H, Soderlund-Venermo M, Hedman K: **Occurrence of newly discovered human polyomaviruses in skin of liver transplant recipients and their relation with squamous cell carcinoma in situ and actinic keratosis - a single-center cohort study.** *Transplant international : official journal of the European Society for Organ Transplantation* 2019, **32**(5):516-522.
68. Amorrortu RP, Fenske NA, Cherpelis BS, Vijayan L, Zhao Y, Balliu J, Messina JL, Sondak VK, Giuliano AR, Gheit T *et al*: **Viruses in Skin Cancer (VIRUSCAN): Study design and baseline characteristics of a prospective clinic-based cohort study.** *Cancer epidemiology, biomarkers & prevention : a publication of the American Association for Cancer Research, cosponsored by the American Society of Preventive Oncology* 2019.

69. Rollison DE, Schell MJ, Fenske NA, Cherpelis B, Messina JL, Giuliano AR, Epling-Burnette PK, Hampras SS, Amorrortu RP, Balliu J *et al*: **Cutaneous Viral Infections Across 2 Anatomic Sites Among a Cohort of Patients Undergoing Skin Cancer Screening**. *J Infect Dis* 2019, **219**(5):711-722.
70. Mertz KD, Paasinen A, Arnold A, Baumann M, Offner F, Willi N, Cathomas G: **Merkel cell polyomavirus large T antigen is detected in rare cases of nonmelanoma skin cancer**. *Journal of cutaneous pathology* 2013, **40**(6):543-549.
71. Mertz KD, Pfaltz M, Junt T, Schmid M, Fernandez Figueras MT, Pfaltz K, Barghorn A, Kempf W: **Merkel cell polyomavirus is present in common warts and carcinoma in situ of the skin**. *Human pathology* 2010, **41**(10):1369-1379.
72. Falchook GS, Rady P, Konopinski JC, Busaidy N, Hess K, Hymes S, Nguyen HP, Prieto VG, Bustinza-Linares E, Lin Q *et al*: **Merkel cell polyomavirus and human papilloma virus in proliferative skin lesions arising in patients treated with BRAF inhibitors**. *Archives of dermatological research* 2016, **308**(5):357-365.
73. Purdie KJ, Proby CM, Rizvi H, Griffin H, Doorbar J, Sommerlad M, Feltkamp MC, der Meijden EV, Inman GJ, South AP *et al*: **The Role of Human Papillomaviruses and Polyomaviruses in BRAF-Inhibitor Induced Cutaneous Squamous Cell Carcinoma and Benign Squamoproliferative Lesions**. *Frontiers in microbiology* 2018, **9**:1806.
74. Bellaud G, Gheit T, Pugin A, Pretet JL, Tommasino M, Mougin C, Aubin F: **Prevalence of human polyomavirus DNA in eyebrow hairs plucked from patients with psoriasis treated with TNF inhibitors**. *Journal of the European Academy of Dermatology and Venereology : JEADV* 2015, **29**(5):1019-1021.
75. Peretti A, Borgogna C, Rossi D, De Paoli L, Bawadekar M, Zavattaro E, Boldorini R, De Andrea M, Gaidano G, Gariglio M: **Analysis of human beta-papillomavirus and Merkel cell polyomavirus infection in skin lesions and eyebrow hair bulbs from a cohort of patients with chronic lymphocytic leukaemia**. *Br J Dermatol* 2014, **171**(6):1525-1528.
76. Hampras SS, Michel A, Schmitt M, Waterboer T, Kranz L, Gheit T, Fisher K, Sondak VK, Messina J, Fenske N *et al*: **Merkel cell polyomavirus (MCV) T-antigen seroreactivity, MCV DNA in eyebrow hairs, and squamous cell carcinoma**. *Infectious agents and cancer* 2015, **10**:35.
77. Nemeth K, Gorog A, Mezey E, Pinter D, Kuroli E, Harsing J, Kovacs L, Fischer M, Rady P, Sillo P *et al*: **Image Correspondence: Cover Image: Detection of hair follicle-associated Merkel cell polyomavirus in an immunocompromised host with follicular spicules and alopecia**. *Br J Dermatol* 2016, **175**(6):1409.
78. Foulongne V, Dereure O, Kluger N, Moles JP, Guillot B, Segondy M: **Merkel cell polyomavirus DNA detection in lesional and nonlesional skin from patients with Merkel cell carcinoma or other skin diseases**. *Br J Dermatol* 2010, **162**(1):59-63.
79. Bellott TR, Baez CF, Almeida SG, Venceslau MT, Zalis MG, Guimaraes MA, Rochael MC, Luz FB, Varella RB, Almeida JR: **Molecular prevalence of Merkel cell polyomavirus in nonmelanoma skin cancer in a Brazilian population**. *Clinical and experimental dermatology* 2017, **42**(4):390-394.
80. Ridd K, Yu S, Bastian BC: **The presence of polyomavirus in non-melanoma skin cancer in organ transplant recipients is rare**. *J Invest Dermatol* 2009, **129**(1):250-252.
81. Ota S, Ishikawa S, Takazawa Y, Goto A, Fujii T, Ohashi K, Fukayama M: **Quantitative analysis of viral load per haploid genome revealed the different biological features of Merkel cell polyomavirus infection in skin tumor**. *PLoS One* 2012, **7**(6):e39954.
82. Scola N, Wieland U, Silling S, Altmeyer P, Stucker M, Kreuter A: **Prevalence of human polyomaviruses in common and rare types of non-Merkel cell carcinoma skin cancer**. *Br J Dermatol* 2012, **167**(6):1315-1320.

83. Mertz KD, Schmid M, Burger B, Itin P, Palmedo G, Scharer L, Kutzner H, Fernandez Figueras MT, Cribier B, Pfaltz M *et al*: **Detection of Merkel cell polyomavirus in epidermodysplasia- verruciformis-associated skin neoplasms.** *Dermatology (Basel, Switzerland)* 2011, **222**(1):87-92.
84. Kwon EK, Halvorson CR, Rady P, Tyring S, Nguyen HP, Kao GF, Gaspari AA: **Merkel cell polyomavirus detection in a patient with familial epidermodysplasia verruciformis.** *Pediatric dermatology* 2013, **30**(4):505-507.
85. Frouin E, Guillot B, Larrieux M, Tempier A, Boulle N, Foulongne V, Girard C, Costes V, Solassol J: **Cutaneous epithelial tumors induced by vemurafenib involve the MAPK and Pi3KCA pathways but not HPV nor HPyV viral infection.** *PLoS One* 2014, **9**(10):e110478.
86. Andres C, Belloni B, Puchta U, Sander CA, Flaig MJ: **Prevalence of MCPyV in Merkel cell carcinoma and non-MCC tumors.** *Journal of cutaneous pathology* 2010, **37**(1):28-34.
87. Hillen LM, Rennspiess D, Speel EJ, Haugg AM, Winnepeninckx V, Zur Hausen A: **Detection of Merkel Cell Polyomavirus in Seborrheic Keratosis.** *Frontiers in microbiology* 2017, **8**:2648.
88. Nguyen KD, Lee EE, Yue Y, Stork J, Pock L, North JP, Vandergriff T, Cockerell C, Hosler GA, Pastrana DV *et al*: **Human polyomavirus 6 and 7 are associated with pruritic and dyskeratotic dermatoses.** *J Am Acad Dermatol* 2017, **76**(5):932-940.e933.
89. Du-Thanh A, Dereure O, Guillot B, Foulongne V: **Merkel cell polyomavirus: its putative involvement in a particular subset of cutaneous lymphoma with possibly unfavorable outcome.** *Journal of clinical virology : the official publication of the Pan American Society for Clinical Virology* 2014, **61**(1):161-165.
90. Gormley RH, Kim EJ, Rook AH, Kovarik CL, Sun A, Rady P, Tyring SK: **Merkel cell polyomavirus in low levels in folliculotropic mycosis fungoides represents a passenger, not a driver.** *International journal of dermatology* 2015, **54**(5):e182-183.
91. Katano H, Ito H, Suzuki Y, Nakamura T, Sato Y, Tsuji T, Matsuo K, Nakagawa H, Sata T: **Detection of Merkel cell polyomavirus in Merkel cell carcinoma and Kaposi's sarcoma.** *J Med Virol* 2009, **81**(11):1951-1958.
92. Du-Thanh A, Guillot B, Dereure O, Foulongne V: **Detection of Merkel cell and other human polyomavirus DNA in lesional and nonlesional skin from patients with Kaposi sarcoma.** *Br J Dermatol* 2015, **173**(4):1063-1065.
93. Imajoh M, Hashida Y, Nakajima H, Sano S, Daibata M: **Prevalence and viral DNA loads of three novel human polyomaviruses in skin cancers from Japanese patients.** *The Journal of dermatology* 2013, **40**(8):657-660.
94. Kassem A, Technau K, Kurz AK, Pantulu D, Loning M, Kayser G, Stickeler E, Weyers W, Diaz C, Werner M *et al*: **Merkel cell polyomavirus sequences are frequently detected in nonmelanoma skin cancer of immunosuppressed patients.** *Int J Cancer* 2009, **125**(2):356-361.
95. Wieland U, Scola N, Stolte B, Stucker M, Silling S, Kreuter A: **No evidence for a causal role of Merkel cell polyomavirus in keratoacanthoma.** *J Am Acad Dermatol* 2012, **67**(1):41-46.
96. Kaibuchi-Noda K, Yokota K, Matsumoto T, Sawada M, Sakakibara A, Kono M, Tomita Y, Watanabe D, Fukumoto H, Katano H *et al*: **Detection of Merkel cell polyomavirus in cutaneous squamous cell carcinoma before occurrence of Merkel cell carcinoma.** *J Am Acad Dermatol* 2011, **65**(5):e152-154.
97. Rollison DE, Giuliano AR, Messina JL, Fenske NA, Cherpelis BS, Sondak VK, Roetzheim RG, Iannacone MR, Michael KM, Gheit T *et al*: **Case-control study of Merkel cell polyomavirus infection and cutaneous squamous cell carcinoma.** *Cancer epidemiology, biomarkers & prevention : a publication of the American Association for Cancer Research, cosponsored by the American Society of Preventive Oncology* 2012, **21**(1):74-81.



98. Mitteldorf C, Mertz KD, Fernandez-Figueras MT, Schmid M, Tronnier M, Kempf W: **Detection of Merkel cell polyomavirus and human papillomaviruses in Merkel cell carcinoma combined with squamous cell carcinoma in immunocompetent European patients.** *The American Journal of dermatopathology* 2012, **34**(5):506-510.
99. Falchook GS, Rady P, Hymes S, Nguyen HP, Tying SK, Prieto VG, Hong DS, Kurzrock R: **Merkel cell polyomavirus and HPV-17 associated with cutaneous squamous cell carcinoma arising in a patient with melanoma treated with the BRAF inhibitor dabrafenib.** *JAMA dermatology* 2013, **149**(3):322-326.
100. Hashida Y, Imajoh M, Nemoto Y, Kamioka M, Taniguchi A, Taguchi T, Kume M, Orihashi K, Daibata M: **Detection of Merkel cell polyomavirus with a tumour-specific signature in non-small cell lung cancer.** *Br J Cancer* 2013, **108**(3):629-637.
101. Hashida Y, Imajoh M, Kamioka M, Taniguchi A, Kuroda N, Hayashi K, Nakajima H, Sano S, Daibata M: **Phylogenetic analysis of Merkel cell polyomavirus based on full-length LT and VP1 gene sequences derived from neoplastic tumours in Japanese patients.** *J Gen Virol* 2014, **95**(Pt 1):135-141.
102. Jung HS, Choi YL, Choi JS, Roh JH, Pyon JK, Woo KJ, Lee EH, Jang KT, Han J, Park CS *et al*: **Detection of Merkel cell polyomavirus in Merkel cell carcinomas and small cell carcinomas by PCR and immunohistochemistry.** *Histology and histopathology* 2011, **26**(10):1231-1241.
103. Andres C, Puchta U, Flaig MJ: **Detection of Merkel cell polyomavirus DNA in atypical fibroxanthoma in correlation to clinical features.** *The American Journal of dermatopathology* 2010, **32**(8):799-803.
104. Aung PP, Rady PL, Nagarajan P, Ivan D, Tetzlaff MT, Curry JL, Tying SK, Prieto VG, Torres-Cabala CA: **Detection of Merkel Cell Polyoma Virus and Beta Human Papillomavirus in Multiple Eccrine Poromas in a Patient With Acute Leukemia Treated With Stem Cell Transplant.** *The American Journal of dermatopathology* 2017, **39**(6):489-491.
105. Kassem A, Pantulu D, Technau K, Kurz AK, Diaz C, Horster S, Nashan D, Weyers W, Zur Hausen A: **Merkel cell polyomavirus in naevoid basal cell carcinoma syndrome-associated basal cell carcinomas and sporadic trichoblastomas.** *Journal of dermatological science* 2010, **59**(2):140-142.
106. Iwasaki T, Kodama H, Matsushita M, Kuroda N, Yamasaki Y, Murakami I, Yamamoto O, Hayashi K: **Merkel cell polyomavirus infection in both components of a combined Merkel cell carcinoma and basal cell carcinoma with ductal differentiation; each component had a similar but different novel Merkel cell polyomavirus large T antigen truncating mutation.** *Human pathology* 2013, **44**(3):442-447.
107. Neto CF, Oliveira WRP, Costa PVA, Cardoso MK, Barreto PG, Romano CM, Urbano PR: **The first observation of the association of Merkel cell polyomavirus and Merkel cell carcinoma in Brazil.** *International journal of dermatology* 2019, **58**(6):703-706.
108. Murakami I, Matsushita M, Iwasaki T, Kuwamoto S, Kato M, Horie Y, Hayashi K, Gogusev J, Jaubert F, Nakamoto S *et al*: **High viral load of Merkel cell polyomavirus DNA sequences in Langerhans cell sarcoma tissues.** *Infectious agents and cancer* 2014, **9**:15.
109. Schrama D, Groesser L, Ugurel S, Hafner C, Pastrana DV, Buck CB, Cerroni L, Theiler A, Becker JC: **Presence of human polyomavirus 6 in mutation-specific BRAF inhibitor-induced epithelial proliferations.** *JAMA dermatology* 2014, **150**(11):1180-1186.
110. Haegblom L, Franzen J, Nasman A: **Human polyomavirus DNA detection in keratoacanthoma and Spitz naevus: no evidence for a causal role.** *Journal of clinical pathology* 2017, **70**(5):451-453.
111. Baez CF, Goncalves MTV, da Rocha WM, Magalhaes de Souza L, Savassi-Ribas F, de Oliveira Almeida NK, Delbue S, Guimaraes M, Cavalcanti SMB, Luz FB *et al*: **Investigation of three oncogenic epitheliotropic viruses shows human papillomavirus in association with non-melanoma skin cancer.**

*European journal of clinical microbiology & infectious diseases* : official publication of the European Society of Clinical Microbiology 2019, **38**(6):1129-1133.

112. Toptan T, Brusadelli MG, Turpin B, Witte DP, Surralles J, Velleuer E, Schramm M, Dietrich R, Brakenhoff RH, Moore PS *et al*: **Limited detection of human polyomaviruses in Fanconi anemia related squamous cell carcinoma.** *PLoS One* 2018, **13**(12):e0209235.
113. Sharp CP, Norja P, Anthony I, Bell JE, Simmonds P: **Reactivation and mutation of newly discovered WU, KI, and Merkel cell carcinoma polyomaviruses in immunosuppressed individuals.** *J Infect Dis* 2009, **199**(3):398-404.
114. Salakova M, Koslabova E, Vojtechova Z, Tachezy R, Sroller V: **Detection of human polyomaviruses MCPyV, HPyV6, and HPyV7 in malignant and non-malignant tonsillar tissues.** *J Med Virol* 2016, **88**(4):695-702.
115. Herberhold S, Hellmich M, Panning M, Bartok E, Silling S, Akgul B, Wieland U: **Human polyomavirus and human papillomavirus prevalence and viral load in non-malignant tonsillar tissue and tonsillar carcinoma.** *Medical microbiology and immunology* 2017, **206**(2):93-103.
116. Cason C, Monasta L, Zanotta N, Campisciano G, Maestri I, Tommasino M, Pawlita M, Villani S, Comar M, Delbue S: **Antibody response to polyomavirus primary infection: high seroprevalence of Merkel cell polyomavirus and lymphoid tissue involvement.** *J Neurovirol* 2018, **24**(3):314-322.
117. Peng J, Li K, Zhang C, Jin Q: **MW polyomavirus and STL polyomavirus present in tonsillar tissues from children with chronic tonsillar disease.** *Clinical microbiology and infection : the official publication of the European Society of Clinical Microbiology and Infectious Diseases* 2016, **22**(1):97.e91-97.e93.
118. Sadeghi M, Wang Y, Ramqvist T, Aaltonen LM, Pyoria L, Toppinen M, Soderlund-Venermo M, Hedman K: **Multiplex detection in tonsillar tissue of all known human polyomaviruses.** *BMC infectious diseases* 2017, **17**(1):409.
119. Chteinberg E, Klufah F, Rennspiess D, Mannheims MF, Abdul-Hamid MA, Losen M, Keijzers M, De Baets MH, Kurz AK, Zur Hausen A: **Low prevalence of Merkel cell polyomavirus in human epithelial thymic tumors.** *Thoracic cancer* 2019, **10**(3):445-451.
120. Sadeghi F, Salehi-Vaziri M, Alizadeh A, Ghodsi SM, Bokharaei-Salim F, Fateh A, Monavari SH, Keyvani H: **Detection of Merkel cell polyomavirus large T-antigen sequences in human central nervous system tumors.** *J Med Virol* 2015, **87**(7):1241-1247.
121. Kolia-Diafouka P, Foulongne V, Boulle N, Ngou J, Kelly H, Sawadogo B, Delany-Moretlwe S, Mayaud P, Segondy M: **Detection of four human polyomaviruses (MCPyV, HPyV6, HPyV7 and TSPyV) in cervical specimens from HIV-infected and HIV-uninfected women.** *Sexually transmitted infections* 2016, **92**(7):492-494.
122. Sadeghi M, Riipinen A, Vaisanen E, Chen T, Kantola K, Surcel HM, Karikoski R, Taskinen H, Soderlund-Venermo M, Hedman K: **Newly discovered KI, WU, and Merkel cell polyomaviruses: no evidence of mother-to-fetus transmission.** *Virology* 2010, **7**:251.
123. Smelov V, Bzhalava D, Arroyo Muhr LS, Eklund C, Komyakov B, Gorelov A, Dillner J, Hultin E: **Detection of DNA viruses in prostate cancer.** *Scientific reports* 2016, **6**:25235.
124. Khan G, Philip PS, Naase M, Al Zarouni KM: **No evidence for the involvement of XMRV or MCV in the pathogenesis of breast cancer.** *Br J Cancer* 2012, **106**(6):1166-1170.
125. Imajoh M, Hashida Y, Nemoto Y, Oguri H, Maeda N, Furihata M, Fukaya T, Daibata M: **Detection of Merkel cell polyomavirus in cervical squamous cell carcinomas and adenocarcinomas from Japanese patients.** *Virology* 2012, **9**:154.

126. Salehi-Vaziri M, Sadeghi F, Alamsi-Hashiani A, Haeri H, Monavari SH, Keyvani H: **Merkel cell polyomavirus and human papillomavirus infections in cervical disease in Iranian women.** *Archives of virology* 2015, **160**(5):1181-1187.
127. Antonsson A, Bialasiewicz S, Rockett RJ, Jacob K, Bennett IC, Sloots TP: **Exploring the prevalence of ten polyomaviruses and two herpes viruses in breast cancer.** *PLoS One* 2012, **7**(8):e39842.
128. Fimereli D, Gacquer D, Fumagalli D, Salgado R, Rothe F, Larsimont D, Sotiriou C, Detours V: **No significant viral transcription detected in whole breast cancer transcriptomes.** *BMC cancer* 2015, **15**:147.
129. Reza MA, Reza MH, Mahdiyeh L, Mehdi F, Hamid ZN: **Evaluation Frequency of Merkel Cell Polyoma, Epstein-Barr and Mouse Mammary Tumor Viruses in Patients with Breast Cancer in Kerman, Southeast of Iran.** *Asian Pacific journal of cancer prevention : APJCP* 2015, **16**(16):7351-7357.
130. Corbex M, Bouzbid S, Traverse-Glehen A, Aouras H, McKay-Chopin S, Carreira C, Lankar A, Tommasino M, Gheit T: **Prevalence of papillomaviruses, polyomaviruses, and herpesviruses in triple-negative and inflammatory breast tumors from algeria compared with other types of breast cancer tumors.** *PLoS One* 2014, **9**(12):e114559.
131. Goh S, Lindau C, Tiveljung-Lindell A, Allander T: **Merkel cell polyomavirus in respiratory tract secretions.** *Emerging infectious diseases* 2009, **15**(3):489-491.
132. Bialasiewicz S, Lambert SB, Whiley DM, Nissen MD, Sloots TP: **Merkel cell polyomavirus DNA in respiratory specimens from children and adults.** *Emerging infectious diseases* 2009, **15**(3):492-494.
133. Abedi Kiasari B, Vallely PJ, Klapper PE: **Merkel cell polyomavirus DNA in immunocompetent and immunocompromised patients with respiratory disease.** *J Med Virol* 2011, **83**(12):2220-2224.
134. Shikova E, Emin D, Alexandrova D, Shindov M, Kumanova capital A C, Lekov A, Moens U: **Detection of Merkel Cell Polyomavirus in Respiratory Tract Specimens.** *Intervirology* 2017, **60**(1-2):28-32.
135. Prezioso C, Di Lella FM, Rodio DM, Bitossi C, Trancassini M, Mele A, de Vito C, Antonelli G, Pietropaolo V: **Merkel Cell Polyomavirus DNA Detection in Respiratory Samples: Study of a Cohort of Patients Affected by Cystic Fibrosis.** *Viruses* 2019, **11**(6).
136. Bergallo M, Costa C, Terlizzi ME, Astegiano S, Curtoni A, Solidoro P, Delsedime L, Cavallo R: **Quantitative detection of the new polyomaviruses KI, WU and Merkel cell virus in transbronchial biopsies from lung transplant recipients.** *Journal of clinical pathology* 2010, **63**(8):722-725.
137. Babakir-Mina M, Ciccozzi M, Lo Presti A, Greco F, Perno CF, Ciotti M: **Identification of Merkel cell polyomavirus in the lower respiratory tract of Italian patients.** *J Med Virol* 2010, **82**(3):505-509.
138. Iaria M, Caccuri F, Apostoli P, Giagulli C, Pelucchi F, Padoan RF, Caruso A, Fiorentini S: **Detection of KI WU and Merkel cell polyomavirus in respiratory tract of cystic fibrosis patients.** *Clinical microbiology and infection : the official publication of the European Society of Clinical Microbiology and Infectious Diseases* 2015, **21**(6):603.e609-615.
139. Andres C, Ihrler S, Puchta U, Flaig MJ: **Merkel cell polyomavirus is prevalent in a subset of small cell lung cancer: a study of 31 patients.** *Thorax* 2009, **64**(11):1007-1008.
140. Joh J, Jenson AB, Moore GD, Rezazadeh A, Slone SP, Ghim SJ, Kloecker GH: **Human papillomavirus (HPV) and Merkel cell polyomavirus (MCPyV) in non small cell lung cancer.** *Experimental and molecular pathology* 2010, **89**(3):222-226.

141. Lasithiotaki I, Antoniou KM, Derdas SP, Sarchianaki E, Symvoulakis EK, Psaraki A, Spandidos DA, Stathopoulos EN, Siafakas NM, Sourvinos G: **The presence of Merkel cell polyomavirus is associated with deregulated expression of BRAF and Bcl-2 genes in non-small cell lung cancer.** *Int J Cancer* 2013, **133**(3):604-611.
142. Xu S, Jiang J, Yu X, Sheng D, Zhu T, Jin M: **Association of Merkel cell polyomavirus infection with EGFR mutation status in Chinese non-small cell lung cancer patients.** *Lung cancer (Amsterdam, Netherlands)* 2014, **83**(3):341-346.
143. Kim GJ, Lee JH, Lee DH: **Clinical and prognostic significance of Merkel cell polyomavirus in nonsmall cell lung cancer.** *Medicine* 2017, **96**(3):e5413.
144. Behdarvand A, Zamani MS, Sadeghi F, Yahyapour Y, Vaziri F, Jamnani FR, Nowruzi B, Fateh A, Siadat SD: **Evaluation of Merkel cell polyomavirus in non-small cell lung cancer and adjacent normal cells.** *Microbial pathogenesis* 2017, **108**:21-26.
145. Gheit T, Munoz JP, Levican J, Gonzalez C, Ampuero S, Parra B, Gaggero A, Corvalan AH, Meneses M, Tommasino M *et al*: **Merkel cell polyomavirus in non-small cell lung carcinomas from Chile.** *Experimental and molecular pathology* 2012, **93**(1):162-166.
146. Helmbold P, Lahtz C, Herpel E, Schnabel PA, Dammann RH: **Frequent hypermethylation of RASSF1A tumour suppressor gene promoter and presence of Merkel cell polyomavirus in small cell lung cancer.** *European journal of cancer (Oxford, England : 1990)* 2009, **45**(12):2207-2211.
147. Hourdequin KC, Lefferts JA, Brennick JB, Ernstoff MS, Tsongalis GJ, Pipas JM: **Merkel cell polyomavirus and extrapulmonary small cell carcinoma.** *Oncology letters* 2013, **6**(4):1049-1052.
148. Bhatia K, Modali R, Goedert JJ: **Merkel cell polyomavirus is not detected in mesotheliomas.** *Journal of clinical virology : the official publication of the Pan American Society for Clinical Virology* 2010, **47**(2):196-198.

**Supplementary Table S2.** MCPyV isolated in sewage water and environmental surfaces.

| Source                                                                                                          | Sequence MCPyV genome | reference |
|-----------------------------------------------------------------------------------------------------------------|-----------------------|-----------|
| Sewage and river water (Brazil, Italy, Argentina, Uruguay)                                                      | Not done              | [1-5]     |
|                                                                                                                 | M-cg-9-11.1           | [6]       |
|                                                                                                                 | M-cg-9-11.3           | [6]       |
|                                                                                                                 | M-cg-28-8.1           | [6]       |
|                                                                                                                 | M-cg-28-8.16          | [6]       |
| Swimming pool                                                                                                   | Not done              | [7]       |
| Environmental surfaces at lab and home (e.g. door handles, tv remote control, computer keyboard and mouse, etc) | Not done              | [8]       |

### References

- [1] S. Bofill-Mas, J. Rodriguez-Manzano, B. Calgua, A. Carratala, R. Girones, Newly described human polyomaviruses Merkel cell, KI and WU are present in urban sewage and may represent potential environmental contaminants, *Virol J*, 7 (2010) 141.
- [2] P. Di Bonito, S.D. Libera, S. Petricca, M. Iaconelli, L. Accardi, M. Muscillo, G. La Rosa, Frequent and abundant Merkel cell polyomavirus detection in urban wastewaters in Italy, *Food and environmental virology*, 7 (2015) 1-6.
- [3] M. Rusinol, X. Fernandez-Cassi, N. Timoneda, A. Carratala, J.F. Abril, C. Silvera, M.J. Figueras, E. Gelati, X. Rodo, D. Kay, P. Wyn-Jones, S. Bofill-Mas, R. Girones, Evidence of viral dissemination and seasonality in a Mediterranean river catchment: Implications for water pollution management, *Journal of environmental management*, 159 (2015) 58-67.
- [4] M. Iaconelli, S. Petricca, S.D. Libera, P. Di Bonito, G. La Rosa, First Detection of Human Papillomaviruses and Human Polyomaviruses in River Waters in Italy, *Food and environmental virology*, 7 (2015) 309-315.
- [5] C. Torres, M.E. Barrios, R.V. Cammarata, D.M. Cisterna, T. Estrada, S. Martini Novas, P. Cahn, M.D. Blanco Fernandez, V.A. Mbayed, High diversity of human polyomaviruses in environmental and clinical samples in Argentina: Detection of JC, BK, Merkel-cell, Malawi, and human 6 and 7 polyomaviruses, *The Science of the total environment*, 542 (2016) 192-202.
- [6] C. Torres, M.E. Barrios, R.V. Cammarata, M. Victoria, X. Fernandez-Cassi, S. Bofill-Mas, R. Colina, M.D. Blanco Fernandez, V.A. Mbayed, Phylodynamics of Merkel-cell polyomavirus and human polyomavirus 6: A long-term history with humans, *Molecular phylogenetics and evolution*, 126 (2018) 210-220.
- [7] G. La Rosa, S. Della Libera, S. Petricca, M. Iaconelli, R. Briancesco, R. Paradiso, M. Semproni, P. Di Bonito, L. Bonadonna, First detection of papillomaviruses and polyomaviruses in swimming pool waters: unrecognized recreational water-related pathogens?, *Journal of applied microbiology*, 119 (2015) 1683-1691.
- [8] V. Foulongne, V. Courgnaud, W. Champeau, M. Segondy, Detection of Merkel cell polyomavirus on environmental surfaces, *J Med Virol*, 83 (2011) 1435-143.

Supplementary Table S3. MCPyV NCCR variants and mutations compared to the consensus sequence.

| <b>Variant<br/>(accession number)</b> | <b>Group</b> | <b>NCCR<sup>a</sup></b>                          | <b>Source</b>       | <b>Reference</b> |
|---------------------------------------|--------------|--------------------------------------------------|---------------------|------------------|
| R06b (HM011538)                       | 2            | ins369AACTC                                      | healthy facial skin | [1]              |
| R09b (HM011539)                       | 1            | ΔT168                                            | healthy facial skin | [1]              |
| R10b (HM011540)                       | 5            | C51T, A251C, ins372ACAAC, Δ381-387AACAAGG, T449C | healthy facial skin | [1]              |
| R12a (HM011541)                       | 1            | consensus                                        | healthy facial skin | [1]              |
| R12b (HM011542)                       | 1            | insA213                                          | healthy facial skin | [1]              |
| R13a (HM011543)                       | 1            | ΔAA221-222                                       | healthy facial skin | [1]              |
| R14a (HM011544)                       | 2            | ins369AACTC                                      | healthy facial skin | [1]              |
| R14b (HM011544)                       | 2            | ins369AACTC                                      | healthy facial skin | [1]              |
| R15a (HM011546)                       | 4            | Δ105-112CCTTAGAT                                 | healthy facial skin | [1]              |
| R15b (HM011547)                       | 4            | Δ105-112CCTTAGAT                                 | healthy facial skin | [1]              |
| R16b (HM011548)                       | 6            | A234T, ins373CAAC, insT379, insAA383, T449C      | healthy facial skin | [1]              |
| R17a (HM011555)                       | 1            | ΔT168                                            | healthy facial skin | [1]              |
| R17b (HM011556)                       | 1            | consensus                                        | healthy facial skin | [1]              |
| R18b (HM011550)                       | 1            | consensus                                        | healthy facial skin | [1]              |
| R20b (HM011551)                       | 1            | consensus                                        | healthy facial skin | [1]              |
| R25b (HM011552)                       | 2            | CT13T, ins369AAC                                 | healthy facial skin | [1]              |
| R26b (HM011553)                       | 1            | C272T, Δ392C                                     | healthy facial skin | [1]              |
| R30a (HM011557)                       | 1            | consensus                                        | healthy facial skin | [1]              |
| R30b (HM011554)                       | 1            | consensus                                        | healthy facial skin | [1]              |
| 124/Sweden (KX827417)                 | 1            | consensus                                        | blood AML patient   | [2]              |
| 7673/2011/HUN<br>(KC202810)           | 3            | T102A, ins372TCAAT                               | MCC                 | [3]              |
| 915F 06 001 PJ2<br>(JQ479315)         | 1            | consensus                                        | healthy facial skin | [4]              |
| 915F 06 002 KN4<br>(JQ479316)         | 2            | ins369AACTC                                      | healthy facial skin | [4]              |
| 915F 06 005 FS2<br>(JQ479318)         | 1            | consensus                                        | healthy facial skin | [4]              |
| 915F 06 004 BG1<br>(JQ479317)         | 1            | C6G                                              | healthy facial skin | [4]              |
| 915F 06 007 FD3<br>(JQ479319)         | 1            | consensus                                        | healthy facial skin | [4]              |

|                            |   |                                                                              |                         |                          |
|----------------------------|---|------------------------------------------------------------------------------|-------------------------|--------------------------|
| 915F 06 008 CG4 (JQ479320) | 2 | ins369AACTC                                                                  | healthy facial skin     | [4]                      |
| AiDo (KJ128376)            | 1 | consensus                                                                    | MCC                     | [5]                      |
| AmePI (KF266965)           | 1 | $\Delta$ T379, insT401, T449C                                                | healthy facial skin     | [6]                      |
| BroLi (KJ128377)           | 1 | consensus                                                                    | MCC                     | [5]                      |
| CVG-1 (MH136801)           | 1 | consensus                                                                    | MCC                     | [7]                      |
| DyskA (KX781279)           | 1 | consensus                                                                    | swab from normal skin   | [8]                      |
| EuroCauC1 (KF266963)       | 1 | G363A                                                                        | healthy facial skin     | [6]                      |
| FraMerk2 (JN383838)        | 1 | $\Delta$ G300                                                                | MCC                     | [9]                      |
| FraMerk20 (JN383839)       | 1 | insA213, G301A, $\Delta$ A304, G309A, G363A                                  | MCC                     | [9]                      |
| FraMerk22 (JN383840)       | 1 | G143T, C170T, C176T, G188A, G363A                                            | MCC                     | [9]                      |
| FraMerk24 (JN383841)       | 1 | G96A, G300T                                                                  | MCC                     | [9]                      |
| HB039C (KC571692)          | 6 | A234T, ins373CAAC, insT379, insAA383, T449C                                  | Feces children          | unpublished <sup>b</sup> |
| HF (JF813003)              | 1 | consensus                                                                    | MCC                     | [10]                     |
| KIB (MK561422)             | 7 | A234T, ins372TCAAC, ins38AA, ins429TTTCTCTTACAAAGGGAGGAGACA                  | Blood healthy volunteer | [11]                     |
| LoKe (KJ128381)            | 1 | consensus                                                                    | MCC                     | [5]                      |
| M-cg-9-11.1 (MG241579)     | 2 | ins369AACTC, insT401, T449C                                                  | sewage sample           | [12]                     |
| M-cg-9-11.3 (MG241580)     | 2 | Ins369AACTC                                                                  | sewage sample           | [12]                     |
| M-cg-28-8-1 (MG241581)     | 1 | A361G                                                                        | sewage sample           | [12]                     |
| M-cg-28-8.16 (MG241582)    | 1 | $\Delta$ A222                                                                | sewage sample           | [12]                     |
| MCC85 (JF813002)           | 1 | C372G                                                                        | MCC                     | [10]                     |
| MCC339 (EU375804)          | 2 | ins369AACTC                                                                  | MCC                     | [13]                     |
| MCC344 (JF812999)          | 2 | ins369AAC                                                                    | MCC                     | [10]                     |
| MCC349 (JF813000)          | 1 | consensus                                                                    | MCC                     | [10]                     |
| MCC350 (EU375804)          | 1 | G32C, G152T, G363A                                                           | MCC                     | [13]                     |
| MCC352 (JF813001)          | 1 | consensus                                                                    | MCC                     | [10]                     |
| MCVw156 (HM355825)         | 1 | G32C, $\Delta$ A222                                                          | MCC                     | unpublished <sup>c</sup> |
| MKL-1 (FJ173815)           | 1 | T52C                                                                         | MCC                     | [14]                     |
| MKT-21 (FM865403)          | 2 | ins369AACTC                                                                  | MCC                     | [15]                     |
| MKT-22 (FM865404)          | 1 | T94C, $\Delta$ T408, C448A                                                   | MCC                     | [15]                     |
| MKT-23 (FM864208)          | 2 | G143A, C145T, C158T, A173G, ins369AACTC                                      | MCC                     | [15]                     |
| MKT-26 (FM865405)          | 1 | T86C, T210C, $\Delta$ A222, A435G                                            | MCC                     | [15]                     |
| MKT-32 (FM995609)          | 1 | T146C, $\Delta$ G274                                                         | MCC                     | [15]                     |
| MS-1 (JX045709)            | 2 | ins369AACTC                                                                  | MCC                     | [13]                     |
| OcepolW1 (KF266964)        | 5 | T5G, C26A, G40A, T108G, ins372372ACAA, $\Delta$ 381-387AACAAGG, C393T, T449C | Swab healthy skin       | [6]                      |
| PeTa (KJ128378)            | 2 | ins369AACTC                                                                  | MCC                     | [5]                      |

|                 |   |                                             |                  |      |
|-----------------|---|---------------------------------------------|------------------|------|
| TKS (FJ464337)  | 6 | A234T, ins373CAAC, insT379, insAA383, T449C | Kaposi's sarcoma | [16] |
| WaGa (KJ128379) | 1 | consensus                                   | MCC              | [5]  |
| WoWe (KJ128380) | 1 | consensus                                   | MCC              | [5]  |

<sup>a</sup>The numbers refer to the nucleotide of the consensus NCCR

<sup>b</sup>direct submission by Li et al., 2013.

<sup>c</sup>direct submission by Carter JJ et al., 2010 and Cahill and Paulson, 2010.

## References

- Schowalter RM, Pastrana DV, Pumphrey KA, Moyer AL, Buck CB: **Merkel cell polyomavirus and two previously unknown polyomaviruses are chronically shed from human skin.** *Cell Host Microbe* 2010, **7**(6):509-515.
- Song Y, Gyarmati P: **Identification of Merkel Cell Polyomavirus from a Patient with Acute Myeloid Leukemia.** *Genome announcements* 2017, **5**(3).
- Horvath KB, Pankovics P, Battyani Z, Kalman E, Reuter G: **[A probable etiological role of Merkel cell polyomavirus in the development of Merkel cell carcinoma].** *Orvosi hetilap* 2013, **154**(3):102-112.
- Foulongne V, Sauvage V, Hebert C, Dereure O, Cheval J, Gouilh MA, Pariente K, Segondy M, Burguiere A, Manuguerra JC *et al*: **Human skin microbiota: high diversity of DNA viruses identified on the human skin by high throughput sequencing.** *PLoS One* 2012, **7**(6):e38499.
- Schrama D, Sarosi EM, Adam C, Ritter C, Kaemmerer U, Klopocki E, Konig EM, Utikal J, Becker JC, Houben R: **Characterization of six Merkel cell polyomavirus-positive Merkel cell carcinoma cell lines: Integration pattern suggest that large T antigen truncating events occur before or during integration.** *Int J Cancer* 2019, **145**(4):1020-1032.
- Martel-Jantin C, Filippone C, Tortevoye P, Afonso PV, Betsem E, Descorps-Declere S, Nicol JT, Touze A, Coursaget P, Crouzat M *et al*: **Molecular epidemiology of merkel cell polyomavirus: evidence for geographically related variant genotypes.** *J Clin Microbiol* 2014, **52**(5):1687-1690.
- Velasquez C, Amako Y, Harold A, Toptan T, Chang Y, Shuda M: **Characterization of a Merkel Cell Polyomavirus-Positive Merkel Cell Carcinoma Cell Line CVG-1.** *Frontiers in microbiology* 2018, **9**:713.
- Nguyen KD, Lee EE, Yue Y, Stork J, Pock L, North JP, Vandergriff T, Cockerell C, Hosler GA, Pastrana DV *et al*: **Human polyomavirus 6 and 7 are associated with pruritic and dyskeratotic dermatoses.** *J Am Acad Dermatol* 2016.
- Martel-Jantin C, Filippone C, Cassar O, Peter M, Tomasic G, Vielh P, Briere J, Petrella T, Aubriot-Lorton MH, Mortier L *et al*: **Genetic variability and integration of Merkel cell polyomavirus in Merkel cell carcinoma.** *Virology* 2012, **426**(2):134-142.
- Feng H, Kwun HJ, Liu X, Gjoerup O, Stolz DB, Chang Y, Moore PS: **Cellular and viral factors regulating Merkel cell polyomavirus replication.** *PLoS One* 2011, **6**(7):e22468.
- Jin HT, Park SJ, Choi EK, Kim YS: **The frequency of Merkel cell polyomavirus in whole blood from immunocompetent and immunosuppressed patients with kidney disease and healthy donors.** *Microbial pathogenesis* 2019, **131**:75-80.
- Torres C, Barrios ME, Cammarata RV, Victoria M, Fernandez-Cassi X, Bofill-Mas S, Colina R, Blanco Fernandez MD, Mbayed VA: **Phylogenetics of Merkel-cell polyomavirus and human polyomavirus 6: A long-term history with humans.** *Molecular phylogenetics and evolution* 2018, **126**:210-220.
- Feng H, Shuda M, Chang Y, Moore PS: **Clonal integration of a polyomavirus in human Merkel cell carcinoma.** *Science (New York, NY)* 2008, **319**(5866):1096-1100.
- Shuda M, Feng H, Kwun HJ, Rosen ST, Gjoerup O, Moore PS, Chang Y: **T antigen mutations are a human tumor-specific signature for Merkel cell polyomavirus.** *Proc Natl Acad Sci U S A* 2008, **105**(42):16272-16277.



15. Touze A, Gaitan J, Maruani A, Le Bidre E, Doussinaud A, Clavel C, Durlach A, Aubin F, Guyetant S, Lorette G *et al*: **Merkel cell polyomavirus strains in patients with merkel cell carcinoma**. *Emerging infectious diseases* 2009, **15**(6):960-962.
16. Katano H, Ito H, Suzuki Y, Nakamura T, Sato Y, Tsuji T, Matsuo K, Nakagawa H, Sata T: **Detection of Merkel cell polyomavirus in Merkel cell carcinoma and Kaposi's sarcoma**. *J Med Virol* 2009, **81**(11):1951-1958.

Supplementary Table S4. Putative consensus transcription factor binding motifs in the consensus MCPyV NCCR.

| Transcription factor | Consensus motif                                                    | Motif in MCPyV NCCR                              | NCCR variants tested in this study with mutation in putative motif |
|----------------------|--------------------------------------------------------------------|--------------------------------------------------|--------------------------------------------------------------------|
| AML1A                | ACCACAAAAT                                                         | <u>AAGTTGTGGT</u> (238-247)*                     |                                                                    |
| AP-1/c-JUN           | TGACTCA                                                            | TGACTCA (287-293) and TGACT <u>G</u> A (314-320) |                                                                    |
| AP-2 $\alpha$ A      | GCAGGC                                                             | GGAGGC (387-392)                                 | 10b ( $\Delta$ 381-387)                                            |
| Cart-1               | AATTA                                                              | AATTA (128-132)                                  |                                                                    |
| C/EBP $\alpha/\beta$ | TTGCTC                                                             | TTGCT <u>G</u> (266-271)                         |                                                                    |
| Chx10                | <sup>A</sup> / <sub>T</sub> T <sup>A</sup> / <sub>T</sub> GCTAATTA | TTTGCTAATTA (122-132)                            |                                                                    |
| CUTL1                | ATTG <u>G</u> T                                                    | ATTGCT (265-270)                                 |                                                                    |
| DP1                  | ATTTCCCGCC                                                         | <u>G</u> TTTCCCGCC (88-92)                       |                                                                    |
| E2F-1                | TCCCGCC                                                            | TCCCGCC (86-92)                                  |                                                                    |
| E2F-5                | TTTCGCGC                                                           | TTT <u>C</u> CGC (84-91)                         |                                                                    |
| E47                  | ATCTGGC                                                            | TTCTGGC (278-284)                                |                                                                    |
| EIIaE-A              | CGCCCTC                                                            | CGCCCT <u>T</u> (89-95)                          |                                                                    |
| Elk-1                | GGAAG                                                              | GGAAG (359-363)                                  |                                                                    |
| ENKTF-1              | TGGCG <sup>C</sup> / <sub>T</sub> <sup>A</sup> / <sub>T</sub> G    | TGGC <u>A</u> TTG (281-288)                      |                                                                    |
| c-Ets-1              | CTTCCTG                                                            | <u>T</u> TCCTG (294-300)                         |                                                                    |
| c-Ets-2              | AGGAAATG                                                           | CATTCCT (299-292)#                               |                                                                    |
| FOXO3A               | CTTAAATA                                                           | CTTAGATA (106-113)                               |                                                                    |
| GATA-1               | GATAAG                                                             | GATA <u>A</u> A (319-324)                        |                                                                    |
| GATA-2               | GCC <sup>C</sup> / <sub>T</sub> TATCT                              | AGATACT <u>G</u> C (109-117)                     |                                                                    |
| HNF-3 $\alpha$       | AAGTAAATAA                                                         | TTATTTA <u>T</u> TT (458-449)                    | 10b (T449C), 16b (T449C)                                           |
| HOXD9                | AATAAAAAATA                                                        | <u>A</u> ACTTTTATT (267-258)                     |                                                                    |
| LF-A1                | TGCCCTG                                                            | TGCCCT <u>I</u> (102-108)                        | 15a ( $\Delta$ 105-112); HUN (T102A)                               |
| NF1                  | TTGGC                                                              | GCCAA (208-204) and GCCAA (239-235)              |                                                                    |
| NF-AT                | AATTTTCC                                                           | <u>T</u> TTTTTCC (162-179)                       |                                                                    |

|           |                                                                    |                                                       |  |
|-----------|--------------------------------------------------------------------|-------------------------------------------------------|--|
| NF-AT3    | T <sup>A</sup> / <sub>T</sub> A <sup>A</sup> / <sub>T</sub> TTTTCC | TTTTTTTTCC (161-170)                                  |  |
| NF-AT4    | A <sup>A</sup> / <sub>T</sub> TTATTTTTCC                           | ATTTATTTTTCA (451-462)                                |  |
| NF-κB     | TGGGAATTTCC                                                        | CTGCAGTTTCC (88-78)                                   |  |
| POU2F2C   | ATGCAAAT                                                           | ATGCAGAAG (10-17)                                     |  |
| POU3F2    | AAATGAA                                                            | AAATGAG (44-50)                                       |  |
| R2        | TCCAAC                                                             | TCCAGA (168-173)                                      |  |
| RELA      | CAGATTTCCC                                                         | CAGTTTCCC (81-90)                                     |  |
| Sp1       | G <sup>G</sup> / <sub>T</sub> GGGCGGG                              | CCCGCCCC (94-87)                                      |  |
| SRY       | AAACAA <sup>A</sup> / <sub>T</sub>                                 | AAACAAA (322-328)                                     |  |
| STAT1β    | ATTTCCAAGA                                                         | ATTTCTGGA (293-302)                                   |  |
| STAT4     | ATTTCC                                                             | GTTTCC (83-88), TTTTCC (165-170),<br>ATTTCC (293-298) |  |
| STAT5A    | GGAA                                                               | TTCC (85-88, 167-170, 295-298) and GGAA<br>(359-362)  |  |
| TBP/TFIID | TATAAAAA                                                           | TTTTTATA (77-70)                                      |  |
| TFIIB     | GTCTCAGA                                                           | GCCTCAGA (143-150)                                    |  |
| USF2      | CAGGTGACC                                                          | AGTCACCTA (230-222)                                   |  |
| VDR       | GGGT                                                               | GGGT (274-277)                                        |  |
| WT1       | GTGTGTG                                                            | ACCTCAC (59-53)                                       |  |

\*Numbers refer to position in the consensus NCCR.

#On the complementary strand

The ALLGEN PROMO transcription factor prediction database was used [1,2]. Motifs with none, one (motif <6 base-pairs) or 2 (motifs >6 base-pairs) mutations compared to the consensus binding site in the MCPyV NCCR are shown.

## References

- [1] Messeguer X, Escudero R, Farré D, Núñez O, Martínez J, Albà MM. PROMO: detection of known transcription regulatory elements using species-tailored searches. *Bioinformatics*. 2002;18(2):333-4. DOI:10.1093/bioinformatics/18.2.333
- [2] Farré D, Roset R, Huerta M, Adsuara JE, Roselló L, Albà MM, Messeguer X. Identification of patterns in biological sequences at the ALGGEN server: PROMO and MALGEN. *Nucleic Acids Res*. 2003;31(13):3651-3. DOI:10.1093/nar/gkg605
